# 1 Identification of Novel Genomic Loci for Anxiety and 2 Extensive Genetic Overlap with Psychiatric Disorders

---

## 3 **Authors**

4 Markos Tesfaye<sup>1,2\*</sup>, Piotr Jaholkowski<sup>1</sup>, Alexey A. Shadrin<sup>1,3</sup>, Dennis van der Meer<sup>1</sup>, Guy F.L.  
5 Hindley<sup>1,4</sup>, Børge Holen<sup>1</sup>, Nadine Parker<sup>1</sup>, Pravesh Parekh<sup>1</sup>, Viktoria Birkenæs<sup>1</sup>, Zillur Rahman<sup>1</sup>,  
6 Shahram Bahrami<sup>1</sup>, Gleda Kutrolli<sup>1</sup>, Oleksandr Frei<sup>1,5</sup>, Srdjan Djurovic<sup>2,3,6</sup> Anders M.  
7 Dale<sup>7,8,9,10</sup>, Olav B. Smeland<sup>1</sup>, Kevin S. O'Connell<sup>1</sup> Ole A. Andreassen<sup>1,3\*</sup>

## 8 **Affiliations**

9 <sup>1</sup> Centre for Precision Psychiatry, Division of Mental Health and Addiction, Oslo University  
10 Hospital, and Institute of Clinical Medicine, University of Oslo, Oslo, Norway

11 <sup>2</sup> Department of Clinical Science, University of Bergen, Bergen, Norway

12 <sup>3</sup> KG Jebsen Centre for Neurodevelopmental Disorders, University of Oslo and Oslo University  
13 Hospital, Oslo, Norway

14 <sup>4</sup> Institute of Psychiatry, Psychology and Neuroscience, King's College London, London, UK

15 <sup>5</sup> Center for Bioinformatics, Department of Informatics, University of Oslo, Oslo, Norway

16 <sup>6</sup> Department of Medical Genetics, Oslo University Hospital, Oslo, Norway

17 <sup>7</sup> Department of Radiology, University of California, San Diego, La Jolla, CA, USA

18 <sup>8</sup> Multimodal Imaging Laboratory, University of California San Diego, La Jolla, CA, USA

19 <sup>9</sup> Department of Psychiatry, University of California, San Diego, La Jolla, CA, USA

20 <sup>10</sup> Department of Neurosciences, University of California San Diego, La Jolla, CA, USA

## 21 22 **\* Corresponding authors**

23 Markos Tesfaye, M.D., Ph.D. ([m.t.woldeyohannes@medisin.uio.no](mailto:m.t.woldeyohannes@medisin.uio.no)) and

24 Ole Andreassen, M.D., Ph.D. ([o.a.andreassen@medisin.uio.no](mailto:o.a.andreassen@medisin.uio.no))

25 Division of Mental Health and Addiction, Oslo University Hospital &

26 Institute of Clinical Medicine, University of Oslo

27 Building 49, Oslo University Hospital, Ullevål,

28 Kirkeveien 166, PO Box 4956 Nydalen, 0424 Oslo, Norway

29

30

31

1 **Abstract**

2 **Background:** Anxiety disorders are prevalent and anxiety symptoms co-occur with many  
3 psychiatric disorders. We aimed to identify genomic risk loci associated with anxiety,  
4 characterize its genetic architecture, and genetic overlap with psychiatric disorders.

5 **Methods:** We used the GWAS of anxiety symptoms, schizophrenia, bipolar disorder, major  
6 depression, and attention deficit hyperactivity disorder (ADHD). We employed MiXeR and  
7 LAVA to characterize the genetic architecture and genetic overlap between the phenotypes.  
8 Conditional and conjunctive false discovery rate analyses were performed to boost the  
9 identification of genomic loci associated with anxiety and those shared with psychiatric  
10 disorders. Gene annotation and gene set analyses were conducted using OpenTargets and  
11 FUMA, respectively.

12 **Results:** Anxiety was polygenic with 12.9k estimated genetic risk variants and overlapped  
13 extensively with psychiatric disorders (4.1-11.4k variants). MiXeR and LAVA revealed  
14 predominantly positive genetic correlations between anxiety and psychiatric disorders. We  
15 identified 114 novel loci for anxiety by conditioning on the psychiatric disorders. We also  
16 identified loci shared between anxiety and major depression ( $n = 47$ ), bipolar disorder ( $n =$   
17  $33$ ), schizophrenia ( $n = 71$ ), and ADHD ( $n = 20$ ). Genes annotated to anxiety loci exhibit  
18 enrichment for a broader range of biological pathways and differential tissue expression in more  
19 diverse tissues than those annotated to the shared loci.

20 **Conclusions:** Anxiety is a highly polygenic phenotype with extensive genetic overlap with  
21 psychiatric disorders. These genetic overlaps enabled the identification of novel loci for anxiety.  
22 The shared genetic architecture may underlie the extensive cross-disorder comorbidity of  
23 anxiety, and the identified genetic loci implicate molecular pathways that may lead to potential  
24 drug targets.

25 **Keywords:** *anxiety, genetic overlap, psychiatric disorder, genetic loci*

## 1 **Introduction**

2 Anxiety is a human emotion while anxiety disorders encompass several categories of mental  
3 disorders characterized by the core features of excessive fear and anxiousness, or avoidance  
4 behaviors.<sup>1</sup> Anxiety disorders including generalized anxiety disorder, panic disorder,  
5 agoraphobia, social anxiety disorder, and specific phobias are among the leading causes of global  
6 disease burden.<sup>2</sup> Because of the extensive phenotypic overlap and comorbidity among various  
7 anxiety disorders,<sup>3</sup> there is a growing recognition that they are better understood and measured  
8 along a continuum rather than discrete categories.<sup>4, 5</sup> Epidemiological data show frequent  
9 comorbidity between anxiety disorders and other psychiatric disorders.<sup>3</sup> For example, nearly  
10 two-thirds of individuals with anxiety disorders also have concurrent depressive disorders.<sup>6</sup>  
11 Anxiety disorders are also common in individuals with bipolar disorder (BIP),<sup>7, 8</sup> schizophrenia  
12 (SCZ),<sup>9</sup> and attention deficit hyperactivity disorder (ADHD).<sup>10, 11</sup> Further, symptoms of anxiety  
13 (ANX), not meeting the criteria for anxiety disorder, frequently co-occur with other psychiatric  
14 disorders.<sup>12, 13</sup> Anxiety disorders and ANX co-occurring with psychiatric disorders have been  
15 linked with greater symptom burden, poorer course and outcome, and lower quality of life.<sup>14-18</sup>  
16 The clinical relevance of co-occurring ANX is highlighted by its inclusion in the diagnostic  
17 criteria of ‘with anxious distress’ as a specifier of psychiatric disorders such as major depression  
18 (MD), and BIP.<sup>1</sup>

19 The etiology of anxiety disorders is not clearly understood; however, both genetic and  
20 environmental factors are involved.<sup>1, 3, 4, 19, 20</sup> Genetic susceptibility plays a major role in anxiety  
21 disorders,<sup>20</sup> with heritability estimates from twin studies ranging between 30 to 50%.<sup>21</sup> Genome-  
22 wide association studies (GWAS) have identified several genetic loci for anxiety disorders,<sup>20, 22,</sup>  
23 <sup>23</sup> and ANX.<sup>24</sup> A study has identified 73 loci associated with latent factor of anxiety symptoms.<sup>25</sup>  
24 Recent evidence from genetic correlation analyses supports the notion that there is shared genetic  
25 liability between psychiatric disorders, and both anxiety disorders and ANX.<sup>22, 24</sup> However,  
26 genetic correlations do not provide a comprehensive overview of the shared genetic architecture  
27 between two phenotypes.<sup>26, 27</sup> The identification of novel genetic loci for anxiety disorders and a  
28 better understanding of the shared genetic landscape with other psychiatric disorders can unveil  
29 more information about the biological pathways underlying anxiety disorders.<sup>28, 29</sup> This is crucial  
30 for the development of more effective treatments against anxiety disorders and comorbid  
31 conditions. Advances in statistical genetics have improved genetic discoveries for complex

1 diseases.<sup>30, 31</sup> The utility of these novel analytical methods in characterizing the genetic  
2 architecture of anxiety disorders and the genetic overlap with psychiatric disorders may add to  
3 our understanding of the underlying biological mechanisms.

4 The standard approach to evaluate shared heritability in complex disorders is to estimate genetic  
5 correlations with linkage disequilibrium score regression (LDSC).<sup>32</sup> However, genetic  
6 correlation, typically a genome-wide summary measure,<sup>31, 33</sup> may conceal shared genetic  
7 architecture involving a mixture of concordant and discordant effect directions and does not  
8 capture specific overlapping loci and relevant genes.<sup>26, 27, 34</sup> These characteristics can be captured  
9 by applying bivariate causal mixture model (MiXeR)<sup>26</sup> and local analysis of covariant  
10 association (LAVA).<sup>34</sup> Genetic overlap can be exploited to boost the discovery of specific  
11 genetic risk loci for a phenotype,<sup>31</sup> and loci shared with other phenotypes by applying  
12 conditional false discovery rate (condFDR) and conjunctive FDR (conjFDR) analyses  
13 respectively.<sup>30, 35</sup>

14 Given the high comorbidity between ANX and psychiatric disorders, we aimed to quantify and  
15 characterize their genetic overlap. To this end, we applied univariate MiXeR to comprehensively  
16 characterize the polygenic architecture of ANX measured using a dimensional scale. We also  
17 employed bivariate MiXeR and LAVA to assess the genetic overlap with MD, SCZ, BIP, and  
18 ADHD. To identify genetic loci associated with ANX, we performed a meta-analysis of two  
19 GWAS and applied the condFDR method. We then performed conjFDR to identify loci shared  
20 between ANX and the four psychiatric disorders. Finally, we tested whether polygenic liability  
21 to the psychiatric disorders predicted anxiety disorder status in an independent sample.

## 22 **Methods and materials**

### 23 *Genome-wide association for anxiety*

24 We obtained quantitative anxiety trait (ANX) data from the UK Biobank (UKB) measured using  
25 the seven-item Generalized Anxiety Disorder (GAD-7) scale in 2016. Genotype data for white  
26 British, unrelated participants (n = 126,569) was used for the GWAS. The mean age (SD) of the  
27 participants was 64.3 (7.6) years, and 55.9% were female.

### 28 *GWAS summary statistics data*

1 We obtained GWAS summary statistics for anxiety symptoms (ANX) measured as a quantitative  
2 trait using the Generalized Anxiety Disorder 2-item scale (GAD-2) from the Million Veterans  
3 Program (MVP) ( $n = 175,163$ ).<sup>24</sup> The ANX GWAS summary statistics were accessed through  
4 the Database of Genotype and Phenotype (dbGaP; phs001672). We obtained GWAS summary  
5 statistics for BIP, ADHD, and SCZ from the Psychiatric Genomics Consortium (PGC),<sup>36-38</sup> and  
6 MD from a meta-analysis of the PGC and 23andMe, Inc.<sup>39</sup> All the GWAS comprised populations  
7 of only European ancestry (Table 1 and *Supplementary Methods* in Supplement 1). All individual  
8 studies contributing to these GWAS datasets have been approved by their respective ethical  
9 committees.

### 10 ***Target sample for polygenic risk score (PRS)***

11 We obtained genotype data for a total of 130,992 population-based cohort of mothers and fathers  
12 from the Norwegian Mother, Father, and Child Cohort Study (MoBa).<sup>40</sup> The MoBa study is  
13 conducted by the Norwegian Institute of Public Health and includes approximately 114,500  
14 children, 95,200 mothers and 75,200 fathers. Participants were enrolled from all over Norway  
15 from 1999-2008. The details of sample collection, genotyping, and quality control are provided  
16 elsewhere.<sup>41, 42</sup> We obtained ICD-10 psychiatric diagnoses from the Norwegian Patient Registry  
17 up until June 2022. Data on a total of 95,841 (58.2 % females) unrelated participants of  
18 European Ancestry was used in the analyses. The mean age (SD) of the participants was  
19 49.0(5.5) years. The cases of anxiety disorder ( $n = 4469$ ) comprised agoraphobia (F40.0,  $n =$   
20 900), social phobia (F40.1,  $n = 1,345$ ), specific phobia (F40.2 = 432), panic disorder (F41.0,  $n =$   
21 1,343), and generalized anxiety disorder (F41.1,  $n = 1,742$ ). MoBa cohort participants had  
22 provided written informed consent at enrollment. We excluded participants who withdrew their  
23 consent from the analyses. MoBa study was approved by the Regional Committees for Medical  
24 and Health Research Ethics (2016/1226).

### 25 ***Statistical analysis***

#### 26 ***GWAS and Meta-analysis***

27 We performed GWAS of ANX (GAD-7 quantitative scores) among unrelated individuals of  
28 European ancestry in the UKB (Project No. 27412). The GWAS was run using PLINK and  
29 applied the following filters: minor allele frequency  $> 0.001$ , Hardy-Weinberg equilibrium  $p$ -

1 value > 1.0e-09, and genotyping missingness rate <0.1. Age, sex and the first 20 genotype  
2 principal components were included as covariates.

3 We performed a fixed-effects inverse variance-weighted meta-analysis of the anxiety (ANX)  
4 GWAS from the MVP and that from the UKB using METAL.<sup>43</sup> The resulting summary statistics  
5 ( $n = 301,732$ ) were used for the investigation of genetic overlap, identification of ANX loci and  
6 shared loci between anxiety (ANX) and psychiatric disorders.

### 7 *Assessing Genetic overlap*

8 We performed a series of MiXeR analyses to investigate the genetic architecture of ANX and its  
9 genetic overlap with MD, BIP, SCZ, and ADHD.<sup>26</sup> First, we conducted univariate MiXeR  
10 analyses to estimate the number of trait-influencing variants explaining 90% of SNP-based  
11 heritability after controlling for linkage disequilibrium (LD). These were followed by bivariate  
12 MiXeR analyses to estimate the number of SNPs shared between pairs of phenotypes  
13 irrespective of effect direction. We also determined the estimated proportion of shared SNPs  
14 between two phenotypes out of the total number of SNPs estimated to influence both phenotypes  
15 (Dice coefficients) and the fraction of SNPs with concordant effects in the shared component.<sup>26</sup>  
16 More detailed information about MiXeR models is provided in the supplement (*Supplementary*  
17 *Methods* in Supplement 1).

18 We employed LAVA to estimate local genetic correlations between ANX, and MD, BIP, SCZ,  
19 and ADHD.<sup>34</sup> LAVA estimates local genetic correlations and local heritability across 2,495  
20 semi-independent genetic regions of approximately 1Mb and identifies shared genetic regions  
21 with their effect directions.<sup>34</sup> It takes sample overlap into account by using the genetic  
22 covariance intercept from LDSC.<sup>32</sup> LAVA estimates the heritability of each of the genetic  
23 regions for each of the phenotypes and then estimates local genetic covariance between pairs of  
24 phenotypes.

### 25 *Conditional and conjunctive false discovery rates*

26 We generated quantile-quantile (Q-Q) plots where the  $p$ -values of single nucleotide  
27 polymorphisms (SNPs) in ANX were plotted conditional on three different cut-offs of  $p$ -values  
28 in the secondary phenotypes (i.e., one of MD, BIP, SCZ, and ADHD). Q-Q plots with successive  
29 leftward and upward deviation compared to the null were considered to exhibit cross-trait

1 enrichment.<sup>30</sup> We performed condFDR analyses to identify loci associated with ANX. Next, we  
2 applied conjFDR analyses to identify loci shared between ANX and each of the secondary  
3 phenotypes respectively.<sup>30, 35</sup> In condFDR analysis, the SNP  $p$ -values in the ANX GWAS  
4 summary statistics were re-ranked based on their  $p$ -values in the GWAS summary statistics of  
5 the secondary phenotype. CondFDR leverages the SNPs' association with the secondary  
6 phenotype to boost the power to identify novel SNPs associated with the primary phenotype (i.e.,  
7 anxiety).<sup>30</sup> This boost in power is contingent on the extent of genetic overlap between the two  
8 phenotypes.<sup>30, 44</sup>

9 We then performed inverse condFDR analyses whereby MD, BIP, SCZ, and ADHD were  
10 primary phenotypes, and ANX was the secondary phenotype and used both pairs of condFDR  
11 results for conjFDR analyses. The conjFDR value for a SNP is defined by taking the maximum  
12 of the condFDR and inverse condFDR values for a given pair of phenotypes.<sup>30</sup> A threshold of  
13 5% was used as statistically significant for both condFDR and conjFDR  $p$ -values. We excluded  
14 SNPs within the extended major histocompatibility complex (MHC) region and chromosome  
15 8p23.1 inversion (genome build 19 positions of chr6:25119106 – 33854733 and chr8:7200000 –  
16 12500000, respectively) from the condFDR model fit procedure, but not from the discovery  
17 analyses.<sup>45</sup> All the  $p$ -values were corrected for inflation using a genomic inflation control  
18 procedure as described previously (*Supplementary Methods* in Supplement 1).<sup>35</sup>

### 19 ***Definition of genomic loci***

20 We designated independent genomic loci according to the functional mapping and gene  
21 annotation (FUMA) protocol.<sup>46</sup> We specified candidate SNPs as any SNP with condFDR or  
22 conjFDR < 0.05, and candidate SNPs with LD  $r^2 < 0.6$  with each other as independent significant  
23 SNPs. Lead SNPs were defined as independent SNPs with LD  $r^2 < 0.1$ . The candidate SNPs in  
24 LD  $r^2 \geq 0.6$  with a lead SNP delineated the boundaries of a genomic locus. We defined all  
25 candidate SNPs positioned within the boundaries of a genomic locus to correspond to a single  
26 independent genomic locus. We obtained LD information from the 1000 Genomes Project  
27 European reference panel.<sup>47</sup> In conjFDR, we interpreted the effect directions by comparing the  $Z$ -  
28 scores of lead SNPs for each locus in the GWAS summary statistics corresponding to the  
29 phenotype. We defined novel risk loci as genomic loci not identified in the GWAS catalog for

1 ANX and anxiety disorder (accessed in January 2024) and in ANX or anxiety disorders  
2 GWAS.<sup>20, 23-25, 48-55</sup>

### 3 *Consistency of genetic effects in an independent sample*

4 We performed a left-sided binomial test of lead SNPs for concordant effect directions in the  
5 discovery (GWAS used for condFDR) and independent dataset from the Finnish population  
6 (FinnGen, <https://r10.finnngen.fi/>). The independent dataset comprised GWAS summary statistics  
7 of lifetime anxiety disorders based on ICD-10 diagnosis in the Finnish population (Table 1).

### 8 *Polygenic risk scores*

9 In MoBa, we restricted the polygenic risk score (PRS) analyses to individuals of European  
10 ancestry selected based on genotype principal components (PCs) as described elsewhere.<sup>56</sup> We  
11 used a kinship coefficient greater than 0.05 to exclude one of the related pairs of study  
12 participants while prioritizing individuals with anxiety disorders. When two related individuals  
13 had an anxiety disorder diagnosis, one of them was selected randomly. We used PRSice<sup>57</sup> to  
14 calculate PRSs at different  $p$ -value thresholds (i.e., 5e-8, 1e-6, 1e-5, 1e-4, 1e-3, 1e-2, 5e-2, 1e-1,  
15 5e-1, 1) using the GWAS summary statistics for ANX, MD, BIP, ADHD, and SCZ (Table 1).  
16 Subsequently, we extracted the first PC for each PRS across all  $p$ -value thresholds.<sup>58</sup> Next, we  
17 used logistic regression to estimate PRS association with anxiety disorder using models that  
18 included PRS of the disorder, and age, sex, and the first 10 genotype PCs as covariates. The  
19 combined model also included the PRSs for all the psychiatric disorders and age, sex, and the  
20 first 10 genotype PCs as covariates.

### 21 *Functional annotations and gene set analyses*

22 We performed functional gene mapping for lead SNPs from cond/conjFDR using the  
23 OpenTargets platform (<https://genetics.opentargets.org/>).<sup>59</sup> For each lead SNP, we selected the  
24 gene with the highest overall score. We used genes mapped to the lead SNPs using the  
25 OpenTarget platform for gene set analyses conducted using the GENE2FUNC analyses in  
26 FUMA. We also obtained Combined Annotation Dependent Depletion (CADD) scores which  
27 show how deleterious the SNP is on protein function,<sup>60</sup> and RegulomeDB scores which predicted  
28 the regulatory function of the SNP from FUMA.<sup>61</sup> We obtained the expression of genes  
29 identified in 54 different human tissues using Genotype-Tissue Expression.<sup>62</sup>



## 1 **Results**

### 2 ***Polygenicity and genetic overlap***

3 The MiXeR analyses showed that ANX is a polygenic trait with  $12.9\text{k} \pm 1.2\text{k}$  (mean  $\pm$  SD) trait-  
4 influencing variants contributing to 90% of its heritability (Supplement 2: Table S1). We  
5 estimated the SNP heritability of ANX to be  $5.1 \pm 0.3\%$  (Table 2). The other psychiatric  
6 disorders were also polygenic with the following estimated numbers of trait-influencing variants:  
7 MD  $13.9\text{k} \pm 0.4\text{k}$ , BIP  $8.6\text{k} \pm 0.2\text{k}$ , SCZ  $9.6\text{k} \pm 0.2\text{k}$ , and ADHD  $7.7\text{k} \pm 0.4\text{k}$  (Supplement 2:  
8 Tables S2 – S5), as reported previously.<sup>27, 36</sup>

9 In the bivariate MiXeR analyses, ANX exhibited a large genetic overlap with psychiatric  
10 disorders as demonstrated by the estimated number of shared variants with MD ( $11.4\text{k} \pm 1.1\text{k}$ ),  
11 BIP ( $8.5\text{k} \pm 0.3\text{k}$ ), SCZ ( $9.4\text{k} \pm 0.3\text{k}$ ), and ADHD ( $4.1\text{k} \pm 0.3\text{k}$ ). The Dice coefficients also  
12 indicated a substantial overlap with MD (84.7%), BIP (79.3%), SCZ (84.0%), and to a lesser  
13 extent with ADHD (39.7%). Most trait-influencing variants shared between ANX, and the  
14 psychiatric disorders had concordant effect directions, with 92% for ADHD, 82% for MD, 60%  
15 for BIP, and 61% for SCZ (Figure 1, Supplement 2: Tables S6 – S9). Genome-wide genetic  
16 correlations using LDSC also showed a significant positive genetic correlation ( $r_g$ ) between  
17 ANX and all four psychiatric disorders (Table 2).

18 Local genetic correlation estimates from LAVA showed that several regions had positive genetic  
19 correlations between ANX and MD ( $n = 17$ ), SCZ ( $n = 6$ ), ADHD ( $n = 3$ ), and BIP ( $n = 1$ ) after  
20 Bonferroni correction. Only one region identified had significant negative genetic correlation  
21 between ANX and SCZ (Figure 2; Supplement 1: Table S10).

### 22 ***Cross-trait polygenic enrichment***

23 We examined the Q-Q plots for cross-trait polygenic enrichment between ANX and psychiatric  
24 disorders. The Q-Q plots SNP  $p$ -values for ANX exhibited upward and leftward deviation when  
25 conditioned on progressively smaller  $p$ -value thresholds from each of MD, BIP, SCZ, and  
26 ADHD (Supplement 1: Figure S1). The pattern of Q-Q plots was consistent with the presence of  
27 polygenic enrichment between ANX and each of the psychiatric disorders.

### 28 ***Identification of genetic loci for anxiety***

1 The meta-analysis identified 11 loci associated with ANX of which four were novel (Figure 3,  
2 Table 3). Further, we leveraged the cross-trait enrichment and genetic overlap between ANX and  
3 psychiatric disorders to identify genomic risk loci for ANX. The condFDR analyses identified  
4 178 unique loci associated with ANX (condFDR < 0.05), 114 of which (64%) were novel  
5 (Supplement 3: Tables S11 – S14). The lead SNPs of the identified ANX-loci showed a  
6 significant *en masse* concordance of effect directions in the independent GWAS of lifetime  
7 anxiety disorders (Table 4).

### 8 ***Genomic loci shared between anxiety and psychiatric disorders***

9 We identified 115 genomic loci shared between ANX and psychiatric disorders. Notably, ANX  
10 and MD had 47 jointly associated loci (conjFDR < 0.05) all having concordant effect direction.  
11 There were 71 loci shared between ANX and SCZ with 52 having concordant effect. Twenty-  
12 four of the 33 shared loci between ANX and BIP, and 19 of the 20 loci shared between ANX and  
13 ADHD had concordant effects (Supplement 3: Tables S15 – S18). Many of the joint loci were  
14 shared across different pairs of traits in conjFDR analysis (Supplement 1: Figure S2).

### 15 ***Polygenic risk scores***

16 The PRS for each of the psychiatric disorders and ANX were positively associated with anxiety  
17 disorders Bonferroni corrected  $p$ -value < 5.1e-16, MD PRS had a larger effect estimate than all  
18 other PRSs. Nagelkerke's  $R^2$  showed that MD PRS explained the largest proportion of liability  
19 for anxiety disorders (1.52%) followed by ANX PRS (0.41%) (Figure 4A-B; Supplement 4:  
20 Table S19). In a multiple regression model where all five PRS were included, the estimates for  
21 the associations remained significant for all except PRS of BIP (Supplement 4: Table S20).

### 22 ***Functional annotations and gene set analyses***

23 The lead SNPs for the four novel ANX-loci identified in the meta-analysis were intronic and  
24 included rs3103257 (*NPPC*), rs6961970 (*FOXP2*), rs143042901 (*PLEKHAI*), and rs11841641  
25 (*DIAPH3*) (Table 3). Two lead SNPs, rs3103257 (*NPPC*) and rs6961970 (*FOXP2*), may have  
26 functional significance as indicated by high CADD (Supplement 3: Table S21). Most of the lead  
27 SNPs in the ANX-loci identified from condFDR were either intronic or intergenic while four of  
28 the lead SNPs were exonic: rs3825393 (*MYO1H*), rs4969391 (*BAIAP2*), rs1468291 (*SERGEF*),  
29 and rs61753077 (*TACC2*) (Supplement 3: Tables S11 – S14). Similarly, most lead SNPs in the

1 shared loci were intronic or intergenic except for a SNP shared between ANX and MD -  
2 rs3825393 (*MYO1H*), which was exonic. Lead SNPs shared between ANX and MD (rs3793577  
3 and rs3825393), ANX and BIP (rs10497655, rs4702 and rs34961470), ANX and SCZ  
4 (rs10497655, rs4702, rs564, rs898031 and rs13262595), and ANX and ADHD (rs61687445 and  
5 rs56403421) had a CADD score >12.37 suggesting potential detrimental effects (Supplement 3:  
6 Tables S15 – S18).

7 Gene set analyses of genes annotated to loci identified for ANX with condFDR revealed  
8 enrichment of biological processes relevant to neurodevelopment such as neurogenesis  
9 (Supplement 5: Table S22). The top enriched cellular components for genes annotated to loci  
10 identified for ANX as well as those shared with psychiatric disorders converged to synapse,  
11 synaptic membrane, and site of polarized growth (Supplement 5: Tables S23 and S24).

12 Enrichment analysis of the genes annotated to ANX loci showed that they are differentially  
13 expressed in the brain, renal cortex, adrenal gland, vascular, gastrointestinal, and adipose tissues.  
14 In contrast, enrichment analysis of the genes annotated to the loci shared between ANX and the  
15 psychiatric disorders showed differential tissue expression in the brain and cardiovascular  
16 tissues, and renal cortex (Supplement 1: Figures S3 - S4).

## 17 **Discussion**

18 Here, we showed that anxiety symptoms are highly polygenic with nearly thirteen thousand trait-  
19 influencing genetic variants, with extensive genetic overlap with other psychiatric disorders  
20 beyond their positive genetic correlations. Overlapping trait-influencing variants were the largest  
21 for ANX and MD, BIP, and SCZ, and a relatively smaller overlap between ANX and ADHD.  
22 The proportion of variants with concordant effects within the shared component was the highest  
23 for ADHD (92%) and lowest for BIP (60%). Local genetic correlations revealed predominantly  
24 positively correlated regions. We identified 114 novel genetic loci associated with ANX, and 115  
25 unique genetic loci shared between ANX and psychiatric disorders, with a similar pattern of  
26 effect directions, and a predominance of concordant effects. Consistent with these, polygenic  
27 liabilities for the different psychiatric disorders predicted a lifetime clinical diagnosis of anxiety  
28 disorders in an independent population-based sample lending further evidence for a shared  
29 genetic risk.

1 We found that ANX is a highly polygenic phenotype. This is important as common genetic  
2 variants contribute to a large portion of its heritability.<sup>20</sup> We also found that common genetic  
3 variants in ANX exhibit low discoverability and hence require very large sample size studies for  
4 genome-wide discoveries. This may partly explain the observed difference between the SNP  
5 heritability we found or reported in other GWASs,<sup>20, 24</sup> and the PRS performance. Our  
6 comprehensive characterization of the genetic overlap between ANX, and MD, BIP, SCZ, and  
7 ADHD disorders using methods agnostic to effect directions such as bivariate MiXeR expand  
8 our understanding beyond genetic correlations.<sup>24</sup> Genetic correlations alone are high for ANX  
9 and other internalizing disorders<sup>24</sup> whereas our results from MiXeR revealed extensive overlap  
10 with externalizing disorders as well. Further, the higher genetic correlation between ANX and  
11 ADHD despite a smaller genetic overlap compared to that of ANX and BIP is probably  
12 accounted for by the similar effect directions for most shared genetic variants with ADHD.<sup>26</sup> The  
13 local genetic correlations are consistent with those reported previously.<sup>63</sup> However, we found  
14 larger numbers of correlated genomic regions between ANX, and MD, SCZ and ADHD  
15 probably due to the larger power of GWAS data used in the current study.

16 By leveraging genetic overlap with psychiatric disorders, we obtained more than 16-fold boost in  
17 the identification of genetic loci for ANX. Researchers have previously reported a boost in  
18 discovery of loci for ANX by leveraging other traits (e.g., neuroticism) using a different  
19 approach.<sup>25</sup> The identification of novel loci revealed biological pathways potentially involved in  
20 the pathophysiology of ANX.<sup>46</sup> Genes annotated to the ANX-loci were enriched for pathways  
21 linked to neurodevelopment and cellular components related the synapse. These highlight the  
22 role of neurodevelopmental factors in the pathophysiology of anxiety.<sup>64</sup> Furthermore, the  
23 pathways related to the synaptic structures are relevant to the identification of potential drug  
24 targets.<sup>65</sup> Similarly, both the large number of shared genetic loci identified between ANX, and  
25 psychiatric disorders and the enriched biological pathways suggest shared mechanisms related to  
26 neurotransmission. We speculate that such shared biological pathways may underlie the higher  
27 prevalence of anxiety among individuals with psychiatric disorders than in the general  
28 population.

29 The identification of novel loci offers valuable insight into the biology of ANX and their  
30 potential molecular mechanisms, especially in relation to comorbid conditions. For example, the  
31 gene *FOXP2* encodes a transcription factor that plays a crucial role in regulating gene expression

1 in the human brain.<sup>66</sup> Mutations in the gene have been associated with speech-language  
2 disorder,<sup>67</sup> and are also linked to a heightened risk of anxiety and depressive disorders.<sup>68</sup>  
3 Similarly, *NPPC*, which encodes a preproprotein for natriuretic peptides, may contribute to the  
4 association between anxiety disorders and cardiovascular diseases.<sup>69</sup> Previous research has  
5 shown that natriuretic peptides can alleviate panic attacks,<sup>70</sup> suggesting a potential therapeutic  
6 avenue for anxiety disorders.<sup>71, 72</sup> Additionally, a study has found an inverse correlation between  
7 plasma levels of atrial natriuretic pro-peptide and anxiety in patients with severe heart failure.<sup>73</sup>  
8 The protein coding gene *DIAPH3*, involved in cell adhesion and motility, and is known to play a  
9 critical role in cortical neurogenesis,<sup>74, 75</sup> further highlighting its relevance to mental disorders.  
10 Furthermore, *PLEKHA1* has been implicated in both depressive symptoms and type 2 diabetes  
11 indicating pleiotropy.<sup>76</sup> Lastly, *MYO1H*, identified in GWAS of anxiety disorders among  
12 individuals of European ancestry,<sup>55</sup> has also been associated with hereditary spastic paraplegia.<sup>77</sup>  
13 Overall, these findings align with observations that anxiety disorders frequently coexist with  
14 various psychiatric and somatic conditions. Further, they provide novel insight into the  
15 underlying shared molecular pathways and may assist in improving the treatment of not only  
16 comorbid anxiety disorders but also for optimizing treatment for concomitant symptoms of  
17 anxiety.

18 Notably, the genes annotated to ANX loci showed differential tissue expression in a much  
19 broader range of tissues including the brain, gastrointestinal, cardiovascular, and endocrine  
20 tissues while those of the shared loci. While these may be due to comorbidity between anxiety  
21 disorders and medical conditions,<sup>78, 79</sup> we argue that ANX has stronger somatic component  
22 involving various organ systems than other psychiatric disorders. Also, the genetic risk for ANX  
23 may influence risk through a more diverse set of tissues than other psychiatric disorders as  
24 demonstrated in animal models.<sup>80</sup>

25 The measures of ANX i.e., the GAD-7 and its shorter version GAD-2 are well established tools  
26 with comparable psychometric properties.<sup>81</sup> ANX as a dimensional trait in the GWAS may have  
27 the advantage of capturing several of the anxiety disorders as well as subsyndromal ANX<sup>81</sup> both  
28 of which have important clinical implications. The recognition of concomitant symptoms of  
29 anxiety is highlighted by the addition of a diagnostic specifier - anxious distress - in DSM-5.<sup>1, 82,</sup>  
30 <sup>83</sup> Anxious distress can have a negative impact on the severity and clinical outcome of primary  
31 psychiatric disorders.<sup>82, 84</sup>

1 We acknowledge that the primary phenotype ANX GWAS<sup>24</sup> was a dimensional trait defined  
2 based on self-reported GAD-2 or GAD-7 and referred to symptoms experienced in the preceding  
3 two weeks rather than a lifetime clinical diagnosis of specific anxiety disorders. This may have  
4 contributed to the low proportion of polygenic liability for lifetime anxiety disorders explained  
5 by the ANX PRS. Since individuals with a history of diagnosis of depression were not excluded  
6 from the ANX GWAS, the genetic overlap between ANX and MD could partly be due to  
7 comorbidity. We applied our analyses to GWAS data from populations of European ancestry and  
8 therefore, generalizations cannot be made to other ancestries. As multi-ancestry GWAS data  
9 become available, our methods can then be applied to improve genetic discoveries for anxiety.

10 In conclusion, our investigation of the genetic architecture of symptoms of anxiety revealed a  
11 high polygenicity and low discoverability. There was also a large genetic overlap between  
12 anxiety and psychiatric disorders, which enabled the identification of 114 novel anxiety loci and  
13 115 shared loci. The shared genetic architecture may underlie the high burden of anxiety  
14 symptoms in individuals with other psychiatric disorders. The genetic risk for anxiety may  
15 involve pathophysiology in neurodevelopment and neurotransmission. The genes annotated to  
16 anxiety loci implicated a broader range of biological pathways as well as differential tissue  
17 expression in more diverse tissues than the shared loci. Our findings advance our understanding  
18 of the pathophysiology of anxiety that occurs alone or concomitantly with other psychiatric  
19 disorders and may help in the identification of potential drug targets. Further research is needed  
20 to investigate the genetic underpinnings of specific types of anxiety disorders.

## 21 **List of acronyms**

22 **ADHD:** Attention Deficit Hyperactivity Disorder, **ANX:** Anxiety symptoms, **BIP:** Bipolar Disorder,  
23 **CADD:** Combined Annotation Dependent Depletion, **CondFDR:** Conditional FDR, **ConjFDR:**  
24 **Conjunctive FDR**, **dbGAP:** Database of Genotype and Phenotype, **FDR:** False Discovery Rate,  
25 **FUMA:** Functional Mapping and Annotations, **GAD-2:** Generalized Anxiety Disorder 2-item scale,  
26 **GAD-7:** Generalized Anxiety Disorder 7-item scale, **GWAS:** Genome-Wide Association Study, **LD:**  
27 **Linkage Disequilibrium**, **LDSC:** Linkage Disequilibrium Score Regression, **MiXeR:** bivariate causal  
28 **mixture model**, **MD:** Major Depression, **MHC:** major histocompatibility complex, **MVP:** Million  
29 **Veterans Program**, **MoBa:** Mor og Barn (Norwegian Mothers and Children Cohort), **PGC:**  
30 **Psychiatric Genomics Consortium**, **Q-Q:** Quantile-Quantile, **SCZ:** Schizophrenia, **SNP:** Single  
31 **Nucleotide Polymorphism**, **UKB:** United Kingdom Biobank

## 32 **Declarations**

## 33 **Ethics approval and consent to participate**

1 The MoBa cohort has initially been approved by the Norwegian Data Protection Agency and The  
2 Regional Committees for Medical and Health Research Ethics in Norway and is currently regulated by  
3 the Norwegian Health Registry Act. The use of MoBa data for this work was approved under (REK  
4 2016/1226). Individual studies comprising the published datasets have been approved by their respective  
5 ethical approval committees. This research was conducted according to the Helsinki Declaration.

#### 6 **Consent for publication**

7 Not Applicable.

#### 8 **Availability of data and materials**

9 GWAS of anxiety can be accessed at <https://www.ncbi.nlm.nih.gov/gap/>, dbGaP Study Accession  
10 phs001672, All PGC data are available at <https://www.med.unc.edu/pgc/download-results/>, Full GWAS  
11 summary statistics for the 23andMe DEP dataset will be available through 23andMe to qualified  
12 researchers under an agreement with 23andMe that protects the privacy of the 23andMe participants.  
13 Interested investigators should email [dataset-request@23andme.com](mailto:dataset-request@23andme.com) and reference this paper for more  
14 information. Access to the MoBa data can be obtained by applying to the Norwegian Institute of Public  
15 Health (NIPH). Restrictions apply regarding the availability of the MoBa data, and therefore, it is not  
16 publicly available. Access can be given after approval provided that the applications are consistent with  
17 the consent provided by participants. Detailed information on the application can be found on the NIPH  
18 website at <https://www.fhi.no/en/studies/moba/>. The cond/conjFDR and MiXeR codes are freely available  
19 online at <https://github.com/precimed/pleiofdr> and <https://github.com/precimed/mixer>, respectively.

#### 20 **Competing interests**

21 Ole A. Andreassen is a consultant for Cortechs.ai and Precision Health, and has received speaker's  
22 honoraria from Lundbeck, Janssen, Otsuka and Sunovion. Srdjan Djurovic has received speaker's  
23 honoraria from Lundbeck. Anders M. Dale was a Founder of and holds equity in CorTechs Labs, Inc, and  
24 serves on its Scientific Advisory Board. He is also a member of the Scientific Advisory Board of Human  
25 Longevity, Inc. (HLI), and the Mohn Medical Imaging and Visualization Centre in Bergen, Norway. He  
26 receives funding through a research agreement with General Electric Healthcare (GEHC). The terms of  
27 these arrangements have been reviewed and approved by the University of California, San Diego in  
28 accordance with its conflict-of-interest policies. The other authors have no conflicts of interest to declare.

#### 29 **Funding**

1 We gratefully acknowledge support from the American National Institutes of Health (NS057198,  
2 EB00790), the Research Council of Norway (RCN) (296030, 324252, 324499, 300309, 273291, 223273),  
3 the South-East Norway Regional Health Authority (2022-073), The University of Oslo, and KG Jebsen  
4 Stiftelsen (SKGJ-MED-021). This project has received funding from the European Union's Horizon 2020  
5 research and innovation program under grant agreements No 847776, 964874, and 801133 under the  
6 Marie Skłodowska-Curie grant. The MoBa study is research is part of the HARVEST collaboration,  
7 supported by the Research Council of Norway (#229624). We also thank the NORMENT Centre for  
8 providing genotype data, funded by the Research Council of Norway (#223273), South East Norway  
9 Health Authorities and Stiftelsen Kristian Gerhard Jebsen. We further thank the Center for Diabetes  
10 Research, the University of Bergen for providing genotype data and performing quality control and  
11 imputation of the data funded by the ERC AdG project SELECTIONPREDISPOSED, Stiftelsen Kristian  
12 Gerhard Jebsen, Trond Mohn Foundation, the Research Council of Norway, the Novo Nordisk  
13 Foundation, the University of Bergen, and the Western Norway Health Authorities

#### 14 **Author contributions**

15 M.T., K.S.O., and O.A.A. conceived and designed the analysis. K.S.O., Z.R., O.F., A.M.D., and O.A.A.  
16 contributed to analysis tools. M.T., P.J., K.S.O., D.V.M., and A.S. performed the analyses. M.T. wrote the  
17 first draft of the manuscript. All authors contributed to the interpretation of the findings, provided critical  
18 intellectual content, and approved the final manuscript.

#### 19 **Acknowledgments**

20 The Norwegian Mother, Father and Child Cohort Study is supported by the Norwegian Ministry of Health  
21 and Care Services and the Ministry of Education and Research. We thank the Norwegian Institute of  
22 Public Health (NIPH) for generating high-quality genomic data. We are grateful to all the participating  
23 families in Norway who take part in this on-going cohort study. We would like to thank the research  
24 participants and employees of 23andMe, the Psychiatric Genomic Consortium (Schizophrenia, Bipolar  
25 Disorder, and Depression Working Groups), the UK Biobank, the Million Veteran Program, and MoBa  
26 for making this work possible. This work was performed on the TSD (Tjeneste for Sensitive Data)  
27 facilities, owned by the University of Oslo, operated and developed by the TSD service group at the  
28 University of Oslo, IT-Department (USIT) ([tsd-drift@usit.uio.no](mailto:tsd-drift@usit.uio.no)).

29 The article has been posted on a preprint server - <https://doi.org/10.1101/2023.09.01.23294920>



## 1   **References**

- 2   1.    APA. *American Psychiatric Association: Diagnostic and Statistical Manual of Mental Disorders*.  
3    American Psychiatric Association, Arlington, VA, 2013.
- 4   2.    Collaborators GBDMD. Global, regional, and national burden of 12 mental disorders in 204  
5    countries and territories, 1990-2019: a systematic analysis for the Global Burden of Disease  
6    Study 2019. *Lancet Psychiatry* 2022; **9**: 137-150.
- 7   3.    Penninx BW, Pine DS, Holmes EA, Reif A. Anxiety disorders. *Lancet* 2021; **397**: 914-927.
- 8   4.    Koen N, Stein, D.J. Chapter 86: Core dimensions of anxiety disorders. In: Geddes JR, Andreasen,  
9    N.C., Goodwin, G.M. (ed.), *New Oxford Textbook of Psychiatry*. Oxford University Press, New  
10    York, USA, 2020; 897–904.
- 11   5.    Meier SM, Deckert J. Genetics of Anxiety Disorders. *Curr Psychiatry Rep* 2019; **21**: 16.
- 12   6.    Lamers F, van Oppen P, Comijs HC et al. Comorbidity patterns of anxiety and depressive  
13    disorders in a large cohort study: the Netherlands Study of Depression and Anxiety (NESDA). *J*  
14    *Clin Psychiatry* 2011; **72**: 341-8.
- 15   7.    Yapici Eser H, Kacar AS, Kilciksiz CM, Yalcinay-Inan M, Ongur D. Prevalence and Associated  
16    Features of Anxiety Disorder Comorbidity in Bipolar Disorder: A Meta-Analysis and Meta-  
17    Regression Study. *Front Psychiatry* 2018; **9**: 229.
- 18   8.    Yapici Eser H, Taskiran AS, Ertinmaz B et al. Anxiety disorders comorbidity in pediatric bipolar  
19    disorder: a meta-analysis and meta-regression study. *Acta Psychiatr Scand* 2020; **141**: 327-339.
- 20   9.    Achim AM, Maziade M, Raymond E, Olivier D, Merette C, Roy MA. How prevalent are anxiety  
21    disorders in schizophrenia? A meta-analysis and critical review on a significant association.  
22    *Schizophr Bull* 2011; **37**: 811-21.
- 23   10.   Fuller-Thomson E, Carrique L, MacNeil A. Generalized anxiety disorder among adults with  
24    attention deficit hyperactivity disorder. *J Affect Disord* 2022; **299**: 707-714.
- 25   11.   Melegari MG, Bruni O, Sacco R, Barni D, Sette S, Donfrancesco R. Comorbidity of Attention  
26    Deficit Hyperactivity Disorder and Generalized Anxiety Disorder in children and adolescents.  
27    *Psychiatry Res* 2018; **270**: 780-785.
- 28   12.   Temmingh H, Stein DJ. Anxiety in Patients with Schizophrenia: Epidemiology and Management.  
29    *CNS Drugs* 2015; **29**: 819-32.
- 30   13.   Kauer-Sant'Anna M, Kapczinski F, Vieta E. Epidemiology and management of anxiety in patients  
31    with bipolar disorder. *CNS Drugs* 2009; **23**: 953-64.
- 32   14.   Spoorthy MS, Chakrabarti S, Grover S. Comorbidity of bipolar and anxiety disorders: An overview  
33    of trends in research. *World J Psychiatry* 2019; **9**: 7-29.
- 34   15.   Wetherell JL, Palmer BW, Thorp SR, Patterson TL, Golshan S, Jeste DV. Anxiety symptoms and  
35    quality of life in middle-aged and older outpatients with schizophrenia and schizoaffective  
36    disorder. *J Clin Psychiatry* 2003; **64**: 1476-82.
- 37   16.   Buonocore M, Bosia M, Bechi M et al. Targeting anxiety to improve quality of life in patients  
38    with schizophrenia. *Eur Psychiatry* 2017; **45**: 129-135.
- 39   17.   Kim SW, Berk L, Kulkarni J et al. Impact of comorbid anxiety disorders and obsessive-compulsive  
40    disorder on 24-month clinical outcomes of bipolar I disorder. *J Affect Disord* 2014; **166**: 243-8.
- 41   18.   Titone MK, Freed RD, O'Garro-Moore JK et al. The role of lifetime anxiety history in the course of  
42    bipolar spectrum disorders. *Psychiatry Res* 2018; **264**: 202-209.
- 43   19.   *American Psychiatric Association: Diagnostic and Statistical Manual of Mental Disorders*.  
44    American Psychiatric Association, Arlington, VA, 2013.
- 45   20.   Purves KL, Coleman JRI, Meier SM et al. A major role for common genetic variation in anxiety  
46    disorders. *Mol Psychiatry* 2020; **25**: 3292-3303.
- 47   21.   Hettema JM, Neale MC, Kendler KS. A review and meta-analysis of the genetic epidemiology of  
48    anxiety disorders. *Am J Psychiatry* 2001; **158**: 1568-78.

- 1 22. Ohi K, Otowa T, Shimada M, Sasaki T, Tanii H. Shared genetic etiology between anxiety disorders  
2 and psychiatric and related intermediate phenotypes. *Psychol Med* 2020; **50**: 692-704.
- 3 23. Wendt FR, Pathak GA, Deak JD et al. Using phenotype risk scores to enhance gene discovery for  
4 generalized anxiety disorder and posttraumatic stress disorder. *Mol Psychiatry* 2022; **27**: 2206-  
5 2215.
- 6 24. Levey DF, Gelernter J, Polimanti R et al. Reproducible Genetic Risk Loci for Anxiety: Results From  
7 approximately 200,000 Participants in the Million Veteran Program. *Am J Psychiatry* 2020; **177**:  
8 223-232.
- 9 25. Thorp JG, Campos AI, Grotzinger AD et al. Symptom-level modelling unravels the shared genetic  
10 architecture of anxiety and depression. *Nat Hum Behav* 2021; **5**: 1432-1442.
- 11 26. Frei O, Holland D, Smeland OB et al. Bivariate causal mixture model quantifies polygenic overlap  
12 between complex traits beyond genetic correlation. *Nat Commun* 2019; **10**: 2417.
- 13 27. Hindley G, Frei O, Shadrin AA et al. Charting the Landscape of Genetic Overlap Between Mental  
14 Disorders and Related Traits Beyond Genetic Correlation. *Am J Psychiatry* 2022; **179**: 833-843.
- 15 28. Craske MG, Stein MB, Eley TC et al. Anxiety disorders. *Nat Rev Dis Primers* 2017; **3**: 17024.
- 16 29. Smoller JW. Anxiety Genetics Goes Genomic. *Am J Psychiatry* 2020; **177**: 190-194.
- 17 30. Smeland OB, Frei O, Shadrin A et al. Discovery of shared genomic loci using the conditional false  
18 discovery rate approach. *Hum Genet* 2020; **139**: 85-94.
- 19 31. Andreassen OA, Hindley GFL, Frei O, Smeland OB. New insights from the last decade of research  
20 in psychiatric genetics: discoveries, challenges and clinical implications. *World Psychiatry* 2023;  
21 **22**: 4-24.
- 22 32. Bulik-Sullivan B, Finucane HK, Anttila V et al. An atlas of genetic correlations across human  
23 diseases and traits. *Nat Genet* 2015; **47**: 1236-41.
- 24 33. Watanabe K, Stringer S, Frei O et al. A global overview of pleiotropy and genetic architecture in  
25 complex traits. *Nat Genet* 2019; **51**: 1339-1348.
- 26 34. Werme J, van der Sluis S, Posthuma D, de Leeuw CA. An integrated framework for local genetic  
27 correlation analysis. *Nat Genet* 2022; **54**: 274-282.
- 28 35. Andreassen OA, Djurovic S, Thompson WK et al. Improved detection of common variants  
29 associated with schizophrenia by leveraging pleiotropy with cardiovascular-disease risk factors.  
30 *Am J Hum Genet* 2013; **92**: 197-209.
- 31 36. Demontis D, Walters GB, Athanasiadis G et al. Genome-wide analyses of ADHD identify 27 risk  
32 loci, refine the genetic architecture and implicate several cognitive domains. *Nat Genet* 2023;  
33 **55**: 198-208.
- 34 37. Trubetskoy V, Pardinas AF, Qi T et al. Mapping genomic loci implicates genes and synaptic  
35 biology in schizophrenia. *Nature* 2022; **604**: 502-508.
- 36 38. Mullins N, Forstner AJ, O'Connell KS et al. Genome-wide association study of more than 40,000  
37 bipolar disorder cases provides new insights into the underlying biology. *Nat Genet* 2021; **53**:  
38 817-829.
- 39 39. Howard DM, Adams MJ, Clarke TK et al. Genome-wide meta-analysis of depression identifies  
40 102 independent variants and highlights the importance of the prefrontal brain regions. *Nat*  
41 *Neurosci* 2019; **22**: 343-352.
- 42 40. Magnus P, Birke C, Vejrup K et al. Cohort Profile Update: The Norwegian Mother and Child  
43 Cohort Study (MoBa). *Int J Epidemiol* 2016; **45**: 382-8.
- 44 41. Jaholkowski P, Shadrin AA, Jangmo A et al. Associations Between Symptoms of Premenstrual  
45 Disorders and Polygenic Liability for Major Psychiatric Disorders. *JAMA Psychiatry* 2023; **80**: 738-  
46 742.
- 47 42. Paltiel L, Haugen A, Skjerden T et al. The biobank of the Norwegian Mother and Child Cohort  
48 Study – present status. *Nor J Epidemiol* 2014; **24**: 29-35.

- 1 43. Willer CJ, Li Y, Abecasis GR. METAL: fast and efficient meta-analysis of genomewide association  
2 scans. *Bioinformatics* 2010; **26**: 2190-1.
- 3 44. Bahrami S, Hindley G, Winsvold BS et al. Dissecting the shared genetic basis of migraine and  
4 mental disorders using novel statistical tools. *Brain* 2022; **145**: 142-153.
- 5 45. Schwartzman A, Lin X. The effect of correlation in false discovery rate estimation. *Biometrika*  
6 2011; **98**: 199-214.
- 7 46. Watanabe K, Taskesen E, van Bochoven A, Posthuma D. Functional mapping and annotation of  
8 genetic associations with FUMA. *Nat Commun* 2017; **8**: 1826.
- 9 47. Genomes Project C, Auton A, Brooks LD et al. A global reference for human genetic variation.  
10 *Nature* 2015; **526**: 68-74.
- 11 48. Otowa T, Hek K, Lee M et al. Meta-analysis of genome-wide association studies of anxiety  
12 disorders. *Mol Psychiatry* 2016; **21**: 1391-9.
- 13 49. Li C, Cheng S, Chen Y et al. Exploratory factor analysis of shared and specific genetic associations  
14 in depression and anxiety. *Prog Neuropsychopharmacol Biol Psychiatry* 2023; **126**: 110781.
- 15 50. Li C, Liang X, Cheng S et al. A multi-environments-gene interaction study of anxiety, depression  
16 and self-harm in the UK Biobank cohort. *J Psychiatr Res* 2022; **147**: 59-66.
- 17 51. Meier SM, Trontti K, Purves KL et al. Genetic Variants Associated With Anxiety and Stress-  
18 Related Disorders: A Genome-Wide Association Study and Mouse-Model Study. *JAMA Psychiatry*  
19 2019; **76**: 924-932.
- 20 52. Zhang Z, Yang X, Jia Y et al. Vitamin D and the Risks of Depression and Anxiety: An Observational  
21 Analysis and Genome-Wide Environment Interaction Study. *Nutrients* 2021; **13**.
- 22 53. Mei L, Gao Y, Chen M et al. Overlapping common genetic architecture between major  
23 depressive disorders and anxiety and stress-related disorders. *Prog Neuropsychopharmacol Biol*  
24 *Psychiatry* 2022; **113**: 110450.
- 25 54. Jia Y, Cheng S, Liu L et al. Association between birth by caesarian section and anxiety, self-harm:  
26 a gene-environment interaction study using UK Biobank data. *BMC Psychiatry* 2023; **23**: 237.
- 27 55. Hettema JM, Verhulst B, Chatzinakos C et al. Genome-wide association study of shared liability  
28 to anxiety disorders in Army STARRS. *Am J Med Genet B Neuropsychiatr Genet* 2020; **183**: 197-  
29 207.
- 30 56. Corfield EC, Frei O, Shadrin AA et al. The Norwegian Mother, Father, and Child cohort study  
31 (MoBa) genotyping data resource: MoBaPsychGen pipeline v.1. *bioRxiv* 2022:  
32 2022.06.23.496289.
- 33 57. Choi SW, O'Reilly PF. PRSice-2: Polygenic Risk Score software for biobank-scale data. *Gigascience*  
34 2019; **8**.
- 35 58. Coombes BJ, Ploner A, Bergen SE, Biernacka JM. A principal component approach to improve  
36 association testing with polygenic risk scores. *Genet Epidemiol* 2020; **44**: 676-686.
- 37 59. Ochoa D, Hercules A, Carmona M et al. The next-generation Open Targets Platform: reimaged,  
38 redesigned, rebuilt. *Nucleic Acids Res* 2022.
- 39 60. Kircher M, Witten DM, Jain P, O'Roak BJ, Cooper GM, Shendure J. A general framework for  
40 estimating the relative pathogenicity of human genetic variants. *Nat Genet* 2014; **46**: 310-5.
- 41 61. Boyle AP, Hong EL, Hariharan M et al. Annotation of functional variation in personal genomes  
42 using RegulomeDB. *Genome Res* 2012; **22**: 1790-7.
- 43 62. Consortium GT, Laboratory DA, Coordinating Center -Analysis Working G et al. Genetic effects  
44 on gene expression across human tissues. *Nature* 2017; **550**: 204-213.
- 45 63. Gerring ZF, Thorp JG, Gamazon ER, Derks EM. A Local Genetic Correlation Analysis Provides  
46 Biological Insights Into the Shared Genetic Architecture of Psychiatric and Substance Use  
47 Phenotypes. *Biol Psychiatry* 2022; **92**: 583-591.

- 1 64. Meyer HC, Lee FS. Translating Developmental Neuroscience to Understand Risk for Psychiatric  
2 Disorders. *Am J Psychiatry* 2019; **176**: 179-185.
- 3 65. Tomasetti C, Iasevoli F, Buonaguro EF et al. Treating the Synapse in Major Psychiatric Disorders:  
4 The Role of Postsynaptic Density Network in Dopamine-Glutamate Interplay and  
5 Psychopharmacologic Drugs Molecular Actions. *Int J Mol Sci* 2017; **18**.
- 6 66. Spiteri E, Konopka G, Coppola G et al. Identification of the transcriptional targets of FOXP2, a  
7 gene linked to speech and language, in developing human brain. *Am J Hum Genet* 2007; **81**:  
8 1144-57.
- 9 67. Fisher SE, Lai CS, Monaco AP. Deciphering the genetic basis of speech and language disorders.  
10 *Annu Rev Neurosci* 2003; **26**: 57-80.
- 11 68. Morison LD, Meffert E, Stampfer M et al. In-depth characterisation of a cohort of individuals  
12 with missense and loss-of-function variants disrupting FOXP2. *J Med Genet* 2023; **60**: 597-607.
- 13 69. Tully PJ, Turnbull DA, Beltrame J et al. Panic disorder and incident coronary heart disease: a  
14 systematic review and meta-regression in 1131612 persons and 58111 cardiac events. *Psychol*  
15 *Med* 2015; **45**: 2909-20.
- 16 70. Strohle A, Kellner M, Holsboer F, Wiedemann K. Anxiolytic activity of atrial natriuretic peptide in  
17 patients with panic disorder. *Am J Psychiatry* 2001; **158**: 1514-6.
- 18 71. Kellner M, Jahn H, Wiedemann K. Natriuretic peptides and panic disorder: therapeutic  
19 prospects. *Expert Rev Neurother* 2003; **3**: 381-6.
- 20 72. Repova K, Aziriova S, Krajcovicova K, Simko F. Cardiovascular therapeutics: A new potential for  
21 anxiety treatment? *Med Res Rev* 2022; **42**: 1202-1245.
- 22 73. Herrmann-Lingen C, Binder L, Klinge M et al. High plasma levels of N-terminal pro-atrial  
23 natriuretic peptide associated with low anxiety in severe heart failure. *Psychosom Med* 2003; **65**:  
24 517-22.
- 25 74. Lau EO, Damiani D, Chehade G et al. DIAPH3 deficiency links microtubules to mitotic errors,  
26 defective neurogenesis, and brain dysfunction. *Elife* 2021; **10**.
- 27 75. Damiani D, Goffinet AM, Alberts A, Tissir F. Lack of Diaph3 relaxes the spindle checkpoint  
28 causing the loss of neural progenitors. *Nat Commun* 2016; **7**: 13509.
- 29 76. Haljas K, Amare AT, Alizadeh BZ et al. Bivariate Genome-Wide Association Study of Depressive  
30 Symptoms With Type 2 Diabetes and Quantitative Glycemic Traits. *Psychosom Med* 2018; **80**:  
31 242-251.
- 32 77. Selcuk E, Kirimtay K, Temizci B et al. MYO1H is a novel candidate gene for autosomal dominant  
33 pure hereditary spastic paraplegia. *Mol Genet Genomics* 2022; **297**: 1141-1150.
- 34 78. Kariuki-Nyuthe C, Stein DJ. Anxiety and Related Disorders and Physical Illness. In: Sartorius N,  
35 Holt RIG, Maj M (eds.), *Comorbidity of Mental and Physical Disorders*. S.Karger AG, 2014; 0.
- 36 79. Sareen J, Cox BJ, Clara I, Asmundson GJ. The relationship between anxiety disorders and physical  
37 disorders in the U.S. National Comorbidity Survey. *Depress Anxiety* 2005; **21**: 193-202.
- 38 80. Parent MB, Ferreira-Neto HC, Kruemmel AR et al. Heart failure impairs mood and memory in  
39 male rats and down-regulates the expression of numerous genes important for synaptic  
40 plasticity in related brain regions. *Behav Brain Res* 2021; **414**: 113452.
- 41 81. Kroenke K, Spitzer RL, Williams JB, Monahan PO, Lowe B. Anxiety disorders in primary care:  
42 prevalence, impairment, comorbidity, and detection. *Ann Intern Med* 2007; **146**: 317-25.
- 43 82. Gaspersz R, Lamers F, Kent JM et al. Longitudinal Predictive Validity of the DSM-5 Anxious  
44 Distress Specifier for Clinical Outcomes in a Large Cohort of Patients With Major Depressive  
45 Disorder. *J Clin Psychiatry* 2017; **78**: 207-213.
- 46 83. Zimmerman M, Kerr S, Balling C, Kiefer R, Dalrymple K. DSM-5 anxious distress specifier in  
47 patients with bipolar depression. *Ann Clin Psychiatry* 2020; **32**: 157-163.

1 84. Gaspersz R, Nawijn L, Lamers F, Penninx B. Patients with anxious depression: overview of  
2 prevalence, pathophysiology and impact on course and treatment outcome. *Curr Opin*  
3 *Psychiatry* 2018; **31**: 17-25.

4

5

1 **Figure Legends:**

2 **Figure 1. A – D:** Bivariate MiXeR – Genome-wide genetic overlap between anxiety symptoms  
3 (ANX), and major depression (MD), bipolar disorder (BIP), schizophrenia (SCZ), and attention  
4 deficit hyperactivity disorder (ADHD).  $r_g$ : genetic correlation. The numbers indicate estimates of  
5 trait-influencing variants in thousands.

6 **Figure 2. A – D:** LAVA – Volcano plots of local genetic correlation coefficients ( $\rho$ ) with  
7  $-\log_{10} p$  values for each locus. Dark red dots represent significantly correlated loci after  
8 Bonferroni correction. ANX: Anxiety symptoms, ADHD: Attention deficit hyperactivity  
9 disorder, BIP: Bipolar disorder, MD: Major depression, SCZ: Schizophrenia.

10 **Figure 3.** Manhattan plot. Genomic risk loci associated with anxiety. Circled dots indicate the  
11 lead single nucleotide polymorphisms with genome-wide significance.

12 **Figure 4. A – B:** Logistic regression – The association between polygenic risk scores (PRS) of  
13 various psychiatric disorders and anxiety disorders in MoBa parents. **A** – models for the PRS of  
14 anxiety symptoms (ANX), attention deficit hyperactivity disorder (ADHD), bipolar disorder  
15 (BIP), major depression (MD), and covariates. **B** – Nagelkerke's  $R^2$  shows the difference in the  
16 percentage of prediction of anxiety traits by each PRS over a base model that includes age, sex,  
17 and genotype principal components.

**Table 1:** GWAS summary statistics data used for investigation of genetic overlap, discovery of genomic risk loci, and polygenic risk prediction.

| Phenotype               | Number of cases | Number of controls | Effective sample size | Source of data                 |
|-------------------------|-----------------|--------------------|-----------------------|--------------------------------|
| MVP-ANX <sup>a</sup>    | -               | -                  | 175,163               | MVP <sup>24</sup>              |
| UKB-ANX <sup>a, b</sup> | -               | -                  | 126,569               | UKB                            |
| META-ANX <sup>a</sup>   |                 |                    | 301,732               | MVP + UKB                      |
| MD                      | 246,363         | 561,190            | 684,817               | PGC-MD + 23andMe <sup>39</sup> |
| BIP                     | 41,917          | 371,549            | 150,670               | PGC-BIP <sup>38</sup>          |
| SCZ                     | 53,386          | 77,258             | 126,282               | PGC-SCZ <sup>37</sup>          |
| ADHD                    | 38,691          | 186,843            | 128,214               | PGC-ADHD <sup>36</sup>         |
| ALL ANX <sup>c</sup>    | 37,517          | 482,693            | 150,058               | FINNGEN                        |

GWAS: Genome-wide association study, ANX: Anxiety symptoms, MD: Major depression, BIP: Bipolar disorder, SCZ: Schizophrenia, ADHD: Attention deficit hyperactivity disorder, MVP: Million Veterans Program, PGC: Psychiatric Genomics Consortium, UKB: UK Biobank, META-ANX: meta-analysis of the MVP-ANX and UKB-ANX.

<sup>a</sup> Quantitative trait without case – control dichotomy.

<sup>b</sup> Project No. 27412

<sup>c</sup> Replication dataset comprising GWAS of various anxiety related disorders

**Table 2:** SNP heritability and genetic correlation parameters between anxiety and psychiatric disorders from LD score regression analyses

| Phenotypes | SNP heritability (SE) | Genetic correlation ( $r_g$ , SE) | $p$ -value ( $r_g$ ) |
|------------|-----------------------|-----------------------------------|----------------------|
| ANX        | 0.051 (0.003)         | 1.00                              | -                    |
| MD         | 0.065 (0.002)         | 0.66 (0.02)                       | 6.45e-193            |
| BIP        | 0.198 (0.008)         | 0.24 (0.03)                       | 4.19e-17             |
| SCZ        | 0.384 (0.013)         | 0.30 (0.03)                       | 5.07e-32             |
| ADHD       | 0.167 (0.008)         | 0.37 (0.03)                       | 6.32e-33             |

SNP: Single nucleotide polymorphism, LD: Linkage disequilibrium, SE: Standard error,  $r_g$ : Genetic correlation, ANX: Anxiety symptoms, MD: Major depression, BIP: Bipolar disorder, SCZ: Schizophrenia, ADHD: Attention deficit hyperactivity disorder.



**Table 3: Genetic risk loci for anxiety identified from meta-analysis of genome-wide association studies.**

| CHR: Position <sup>1</sup> | SNP         | A1 | A2 | Gene <sup>2</sup> | Function       | Beta (SE)       | p-value  |
|----------------------------|-------------|----|----|-------------------|----------------|-----------------|----------|
| 2: 63893589                | rs17619012  | T  | G  | <i>WDPCP</i>      | intergenic     | -0.023 (0.0039) | 2.80E-09 |
| 2: 233005775               | rs3103257   | A  | G  | <i>NPPC</i>       | intronic       | 0.020 (0.0036)  | 3.23E-08 |
| 3: 18795765                | rs7622860   | A  | C  | <i>SATB1</i>      | ncRNA_intronic | 0.023 (0.0036)  | 8.09E-11 |
| 7: 113901132               | rs6961970   | A  | C  | <i>FOXP2</i>      | intronic       | 0.021 (0.0038)  | 4.40E-08 |
| 9: 98273305                | rs145965565 | T  | G  | <i>PTCH1</i>      | intronic       | -0.032 (0.0056) | 8.99E-09 |
| 10: 75496130               | rs12253482  | A  | G  | <i>CAMK2G</i>     | ncRNA_intronic | 0.018 (0.0033)  | 4.09E-08 |
| 10: 124012277              | rs143042901 | A  | G  | <i>PLEKHA1</i>    | intronic       | -0.050 (0.0092) | 4.98E-08 |
| 13: 60362163               | rs11841641  | T  | C  | <i>DIAPH3</i>     | intronic       | 0.040 (0.007)   | 1.67E-08 |
| 14: 42075952               | rs1111179   | T  | G  | <i>LRFN5</i>      | upstream       | -0.018 (0.0032) | 4.90E-08 |
| 17: 43911716               | rs242949    | T  | G  | <i>MAPT</i>       | intronic       | -0.019 (0.0033) | 1.37E-08 |
| 20: 62714171               | rs539856305 | T  | G  | <i>OPRL1</i>      | intronic       | 0.034 (0.0057)  | 2.02E-09 |

<sup>1</sup>Based on genome build hg19.

<sup>2</sup>Genes annotations were based on the highest overall score in OpenTargets.

CHR Chromosome; A1 Effect allele; A2 Other allele; SNP single nucleotide polymorphism; SE Standard error.

The rows with novel loci are shaded in grey.

**Table 4:** *En masse* test of concordance of effect directions between genetic variants identified for ANX (condFDR) and corresponding variants in independent GWAS of anxiety disorders from the Finnish population (FINNGEN).

| CondFDR Phenotype pairs | ANX-loci ( <i>n</i> ) | SNPs ( <i>n</i> ) in the replication dataset | SNPs ( <i>n</i> ) with concordant effects | <i>p</i> -value* |
|-------------------------|-----------------------|----------------------------------------------|-------------------------------------------|------------------|
| ANX   MD                | 81                    | 79                                           | 69 (87%)                                  | 2.77E-12         |
| ANX   BIP               | 61                    | 60                                           | 49 (82%)                                  | 3.78E-07         |
| ANX   SCZ               | 105                   | 105                                          | 88 (84%)                                  | 4.98E-13         |
| ANX   ADHD              | 57                    | 57                                           | 47 (82%)                                  | 3.76E-07         |

GWAS: Genome-wide association study, SNP: Single nucleotide polymorphism, FDR: False discovery rate, ANX: Anxiety symptoms, MD: Major depression, BIP: Bipolar disorder, SCZ: Schizophrenia, ADHD: Attention deficit hyperactivity disorder, \*one-sided binomial test

1

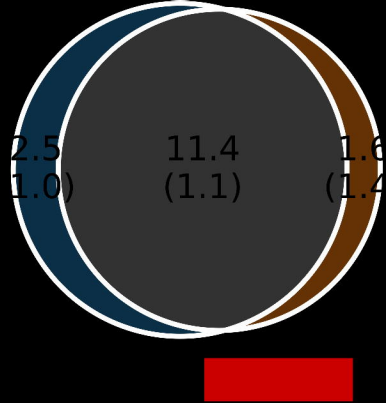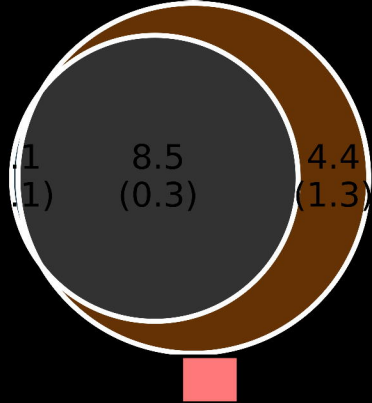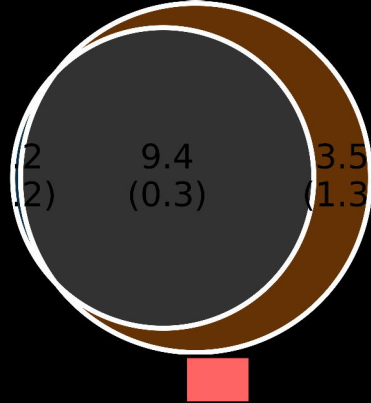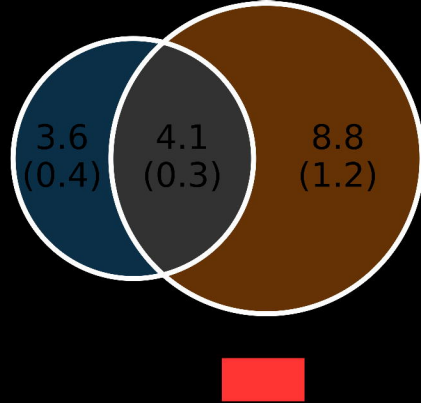

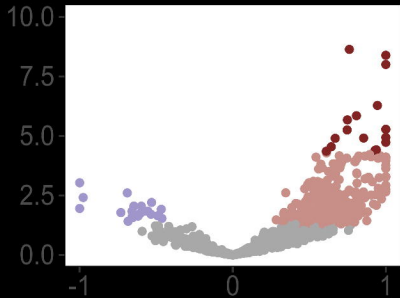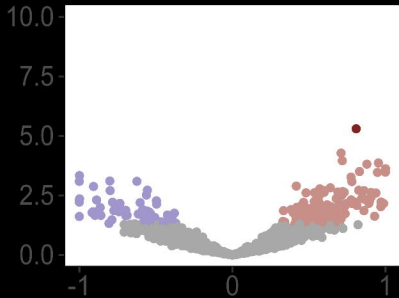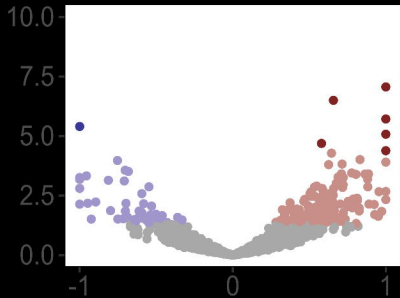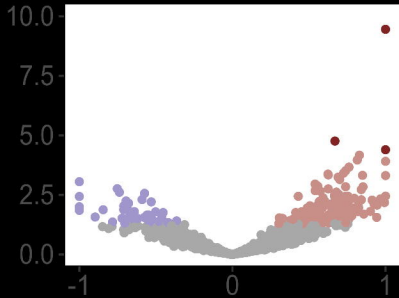

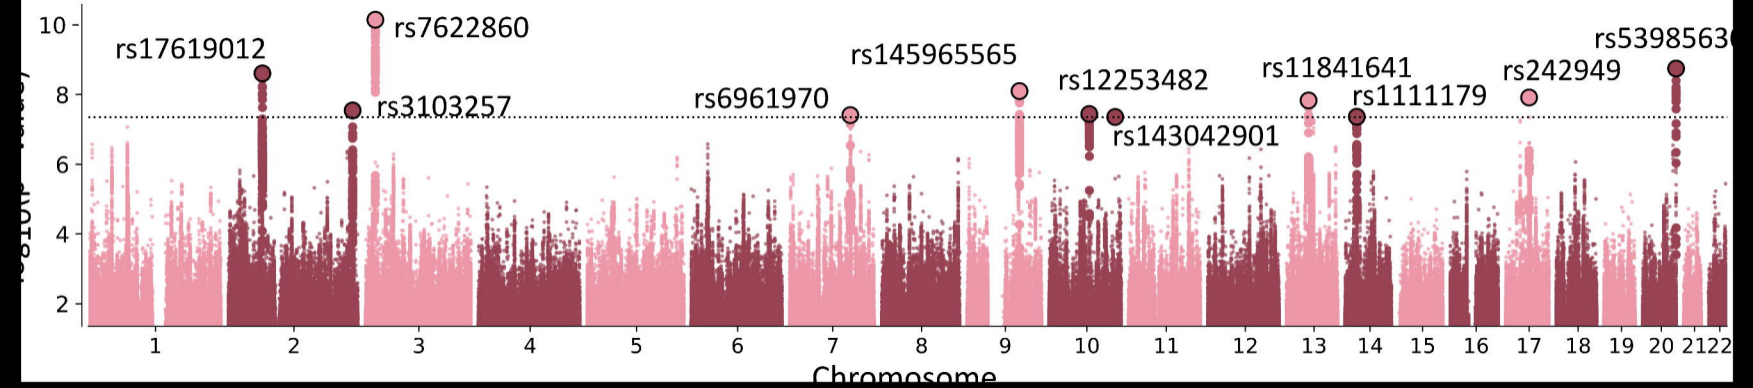

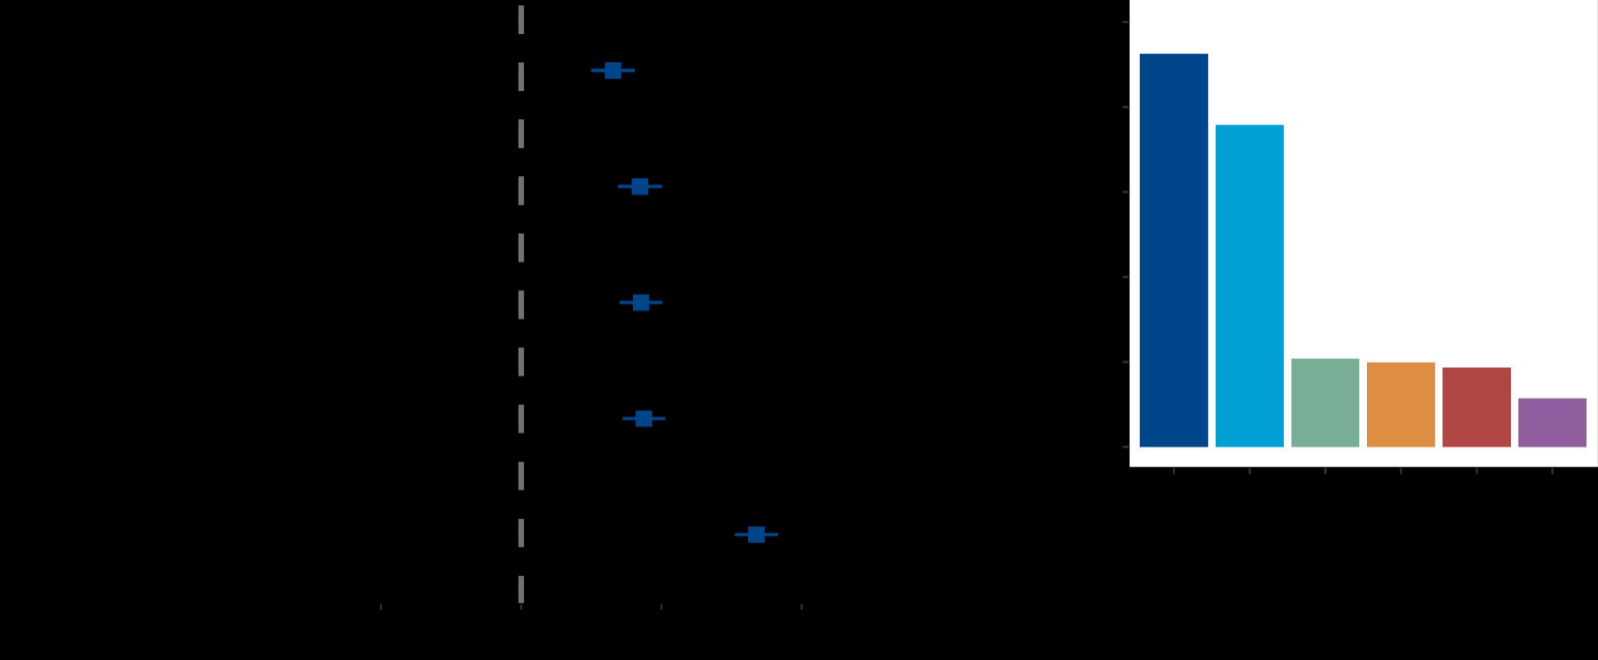

Source: https://www.medrxiv.org/content/10.1101/2023.09.01.23294920v2.full.pdf
